# Supplementary material
Source: publisher figshare collection journal article supplement (https://tandf.figshare.com/articles/dataset/_/9164207)
Supplement: Supplementary file 1 [file 2]

### Calculation of low field effect (LFE) by two-proton model

Here the Hamiltonian below is assumed ( $I_1 = I_2 = 1/2$ ).

$$\hat{H} = \sum_{i=1,2} \frac{g_i \mu_B B_0}{\hbar} \hat{S}_{zi} + a_1 \hat{\mathbf{S}}_1 \cdot \hat{\mathbf{I}}_1 + a_2 \hat{\mathbf{S}}_2 \cdot \hat{\mathbf{I}}_2 \approx \omega_0 (\hat{S}_{z1} + \hat{S}_{z2}) + a_1 \hat{\mathbf{S}}_1 \cdot \hat{\mathbf{I}}_1 + a_2 \hat{\mathbf{S}}_2 \cdot \hat{\mathbf{I}}_2 \quad (1)$$

Difference in g values are ignored because we will discuss the spin dynamics at very low magnetic fields. Out of  $2^{2+2} = 16$  eigenstates of the Hamiltonian, the 7 states below are involved in the LFE as Lewis et al.[1] reported (for the full description, see the supporting information for the original paper).

$$\left. \begin{aligned} |2\rangle &= c_{2+} |T_{+1}\alpha\beta\rangle + \frac{c_{2-}}{\sqrt{2}} (|T_0\alpha\alpha\rangle + |S\alpha\alpha\rangle), \\ |4\rangle &= c_{1+} |T_{+1}\beta\alpha\rangle - \frac{c_{1+}}{\sqrt{2}} (|T_0\alpha\alpha\rangle - |S\alpha\alpha\rangle), \\ |6\rangle &= \frac{1}{\sqrt{2}} (|T_0\alpha\beta\rangle + |S\alpha\beta\rangle), \\ |7\rangle &= c_{1+}c_{2+} |T_{+1}\beta\beta\rangle + \frac{c_{1+}c_{2-}}{\sqrt{2}} (|T_0\beta\alpha\rangle + |S\beta\alpha\rangle) \\ &\quad + \frac{c_{1-}c_{2+}}{\sqrt{2}} (|T_0\alpha\beta\rangle - |S\alpha\beta\rangle) + c_{1-}c_{2-} |T_{-1}\alpha\alpha\rangle, \\ |11\rangle &= \frac{1}{\sqrt{2}} (|T_0\beta\alpha\rangle - |S\beta\alpha\rangle), \\ |12\rangle &= \frac{c_{2+}}{\sqrt{2}} (|T_0\beta\beta\rangle - |S\beta\beta\rangle) + c_{2-} |T_{-1}\beta\alpha\rangle, \\ |14\rangle &= \frac{c_{1+}}{\sqrt{2}} (|T_0\beta\beta\rangle + |S\beta\beta\rangle) + c_{1-} |T_{-1}\alpha\beta\rangle, \end{aligned} \right\} \begin{aligned} &F = +1 \\ &F = 0 \\ &F = -1 \end{aligned} \quad (2)$$

and

$$\begin{aligned}
& \left. \begin{aligned} \omega_2 &= \frac{\omega_0 + \mu_2}{2} + \frac{a_1 - a_2}{4}, \\ \omega_4 &= \frac{\omega_0 + \mu_1}{2} + \frac{-a_1 + a_2}{4}, \end{aligned} \right\} F = +1 \\
& \left. \begin{aligned} \omega_6 &= \frac{a_1 + a_2}{4}, \\ \omega_7 &= \frac{\mu_1 + \mu_2}{2} - \frac{a_1 + a_2}{4}, \\ \omega_{11} &= \frac{a_1 + a_2}{4}, \end{aligned} \right\} F = 0 \\
& \left. \begin{aligned} \omega_{12} &= -\frac{\omega_0 - \mu_2}{2} + \frac{a_1 - a_2}{4}, \\ \omega_{14} &= -\frac{\omega_0 + \mu_1}{2} - \frac{a_1 - a_2}{4}, \end{aligned} \right\} F = -1
\end{aligned} \tag{3}$$

where

$$\mu_i = \sqrt{\omega_0^2 + a_i^2} \tag{4}$$

and

$$c_{i\pm}^2 = \frac{\mu_i \pm \omega_0}{2\mu_i} \tag{5}$$

The time dependent singlet population for the singlet-born radical pair is described as

$$P_s(t) = \frac{1}{Z} \sum_{m,n} \left| \langle n | \hat{P}_s | m \rangle \right|^2 e^{i\omega_{mn}t} \tag{6}$$

By applying a magnetic field, breakdown of zero-field degeneracy occurs for the 4 pairs of eigenstates (note that  $\omega_k = \omega_{11}$  at any magnetic field), so that the oscillation becomes active as

$$\begin{aligned}
P_s^{2-4}(t) &= \left| \langle 2 | \hat{P}_s | 4 \rangle \right|^2 e^{i\omega_{2-4}t} = \frac{1}{4} c_{1-}^2 c_{2-}^2 \exp \left\{ i \left( -\frac{\mu_1 - \mu_2}{2} + \frac{a_1 - a_2}{2} \right) t \right\} \\
P_s^{6-7}(t) &= \left| \langle 6 | \hat{P}_s | 7 \rangle \right|^2 e^{i\omega_{6-7}t} = \frac{1}{4} c_{1-}^2 c_{2+}^2 \exp \left\{ -i \left( \frac{\mu_1 + \mu_2}{2} - \frac{a_1 + a_2}{2} \right) t \right\} \\
P_s^{7-11}(t) &= \left| \langle 7 | \hat{P}_s | 11 \rangle \right|^2 e^{i\omega_{7-11}t} = \frac{1}{4} c_{1+}^2 c_{2-}^2 \exp \left\{ i \left( \frac{\mu_1 + \mu_2}{2} - \frac{a_1 + a_2}{2} \right) t \right\} \\
P_s^{12-14}(t) &= \left| \langle 12 | \hat{P}_s | 14 \rangle \right|^2 e^{i\omega_{12-14}t} = \frac{1}{4} c_{1+}^2 c_{2+}^2 \exp \left\{ i \left( -\frac{\mu_1 - \mu_2}{2} + \frac{a_1 - a_2}{2} \right) t \right\}
\end{aligned} \tag{7}$$

Let us assume that the total HF coupling is constant ( $a_1 > a_2 > 0$ ) as

$$\begin{aligned}
a &\equiv a_1 + a_2 \\
r &\equiv \frac{a_2}{a_1} \quad (0 \leq r \leq 1) \\
R &\equiv \frac{\omega_0}{a} \quad (0 \leq R)
\end{aligned} \tag{8}$$

Thus

$$\begin{aligned}
a_1 &= \frac{a}{1+r} \\
a_2 &= \frac{ar}{1+r}
\end{aligned} \tag{9}$$

$$\begin{aligned}
\mu_1 &= \sqrt{\omega_0^2 + a_1^2} = \sqrt{a^2 R^2 + \frac{a^2}{(1+r)^2}} = a \sqrt{R^2 + \frac{1}{(1+r)^2}} \\
\mu_2 &= \sqrt{\omega_0^2 + a_2^2} = \sqrt{a^2 R^2 + \frac{a^2 r^2}{(1+r)^2}} = a \sqrt{R^2 + \frac{r^2}{(1+r)^2}}
\end{aligned} \tag{10}$$

The angular frequency parts of eq. 7 is thus rewritten as

$$\begin{aligned}
\omega_{2-4} = \omega_{12-14} &= \left( -\frac{\mu_1 - \mu_2}{2} + \frac{a_1 - a_2}{2} \right) = \frac{a}{2} \left( -\sqrt{R^2 + \frac{1}{(1+r)^2}} + \sqrt{R^2 + \frac{r^2}{(1+r)^2}} + \frac{1-r}{1+r} \right) \geq 0 \\
-\omega_{6-7} = \omega_{7-11} &= \left( \frac{\mu_1 + \mu_2}{2} - \frac{a_1 + a_2}{2} \right) = \frac{a}{2} \left( \sqrt{R^2 + \frac{1}{(1+r)^2}} + \sqrt{R^2 + \frac{r^2}{(1+r)^2}} - 1 \right) \geq 0
\end{aligned} \tag{11}$$

These indicate that the mixing frequencies linearly increases with the total coupling  $a$  at very low magnetic fields where  $\omega_0 \ll a$  ( $R \sim 0$ ). The first derivative of  $\omega_{2-4}$  is

$$\frac{\partial \omega_{2-4}}{\partial r} = \frac{a}{2} \left( \frac{1}{\sqrt{(1+r)^4 + R^2 (1+r)^6}} + \frac{r}{\sqrt{r^2 (1+r)^4 + R^2 (1+r)^6}} - \frac{2}{(1+r)^2} \right) \tag{12}$$

This value is maximised when  $R = 0$  irrespective of  $r$  values, so that

$$\begin{aligned}
\frac{\partial \omega_{2-4}}{\partial r} (\max) &= \frac{a}{2} \left( \frac{1}{\sqrt{(1+r)^4}} + \frac{r}{\sqrt{r^2 (1+r)^4}} - \frac{2}{(1+r)^2} \right) \\
&= \frac{a}{2} \left( \frac{1}{(1+r)^2} + \frac{1}{(1+r)^2} - \frac{2}{(1+r)^2} \right) = 0
\end{aligned} \tag{13}$$

Thus

$$\frac{\partial \omega_{2-4}}{\partial r} \leq 0 \tag{14}$$

at any  $r$  and  $R$  values in the defined range.

On the other hand, the first derivative of  $-\omega_{6-7}$  is

$$\begin{aligned}\frac{-\partial\omega_{6-7}}{\partial r} &= \frac{a}{2} \left( \frac{r}{\sqrt{r^2(1+r)^4 + R^2(1+r)^6}} - \frac{1}{\sqrt{(1+r)^4 + R^2(1+r)^6}} \right) \\ &= \frac{a}{2} \left( \frac{r}{\sqrt{r^2(1+r)^4 + R^2(1+r)^6}} - \frac{r}{\sqrt{r^2(1+r)^4 + r^2R^2(1+r)^6}} \right)\end{aligned}\quad (15)$$

Since  $0 < r < 1$ ,  $R^2 > r^2R^2$ , so that

$$\frac{-\partial\omega_{6-7}}{\partial r} \leq 0 \quad (16)$$

From these calculations, it turns out that all the four angular frequencies monotonically decrease with increasing  $r$ , which means that the mixing frequency is lower for similar HF coupling constants for the two radicals.

Dependence of  $\omega_{2-4}$  and  $-\omega_{6-7}$  on  $r$  at  $R = 0.168$ , which is the same condition for the  $B_0 = 0.6$  mT and  $a/2\pi = 100$  MHz as shown in Figure 3 in the main text, is shown in Figure S1-1.

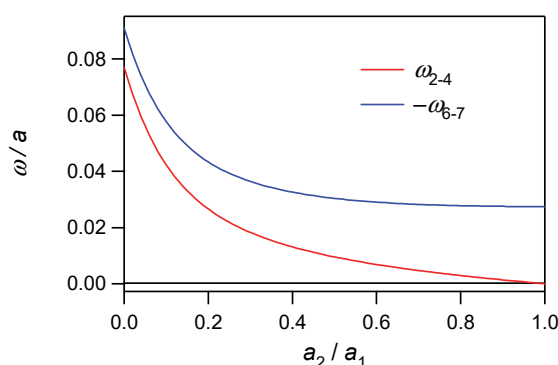

Figure S1-1. Dependence of the relative mixing frequency  $\omega/(a_1+a_2)$  on the relative HF coupling  $a_2/a_1$  at a low magnetic field of  $\omega_0/a = 0.168$ .

The mixing frequencies are almost ten times lower than the total HF coupling at  $r = 0$  (HF coupling on only one radical) and reduces significantly with increasing  $r$  (more balanced HF couplings for the two radicals).

[1] A. M. Lewis, T. P. Fay, D. E. Manolopoulos, C. Kerpál, S. Richert and C. R. Timmel, J. Chem. Phys. **149**, 034103 (2018).
